# Supplementary material
Source: Research Square preprint supplement (doi:10.21203/rs.3.rs-8933754/v1)
Supplement: Supplementary file 1 [file a3cc4a10d10f5c4254947694.xlsx]

## Sheet: Sheet1
Study	Q1: Sample frame	Q2: Sampling	Q3: Sample size	Q4: Subjects/setting described	Q5: Coverage of sample	Q6: Valid methods	Q7: Standard measurement	Q8: Statistical analysis	Q9: Response rate	Overall
Torty et al. (2024)	High	High	High	Low	Low	Low	Moderate	Low	Moderate	Moderate–High
Oshodi et al. (2017)	High	High	High	Low	Low	Low	Low	Low	Moderate	High
Chinawa et al. (2016)	Low	Low	Low	Low	Low	High	High	Low	Moderate	Moderate
Mojeed et al. (2017)	High	High	High	Low	Low	Low	Moderate	Low	Moderate	High
Bakare et al. (2012)	High	Moderate	High	Moderate	Low	Low	Moderate	Low	Moderate	High
Lagunju et al. (2014)	High	High	High	Low	Low	Low	Moderate	Low	Moderate	Moderate
Ahmad et al. (2019)	High	High	High	Low	Low	Low	Moderate	Low	Moderate	Moderate
West & Aitafo (2025)	High	Low	Low	Low	Low	Low	Low	Low	Moderate	Moderate
